# Supplementary material for: On the calculation of multiplet energies of three-open-shell 4f135fn6d1electron configuration by LFDFT: modeling the optical spectra of 4f core-electron excitation in actinide compounds
Source: Royal Society of Chemistry journal article supplement (doi:10.1039/c7cp06198f), 2017-01-01
Supplement: c7cp06198f1.pdf [file c7cp06198f1.pdf]

**On the calculation of multiplet energies of three-open-shell  $4f^{13}5f^n6d^1$  electron configuration by LFDFT: modeling the optical spectra of  $4f$  core-electron excitation in actinide compounds**

Harry Ramanantoanina

Paul Scherrer Institute, CH-5232 Villigen, Switzerland; E-mail: [harry.ra@hotmail.com](mailto:harry.ra@hotmail.com)

---

Electronic Supplementary Information ESI (6 pages)

---

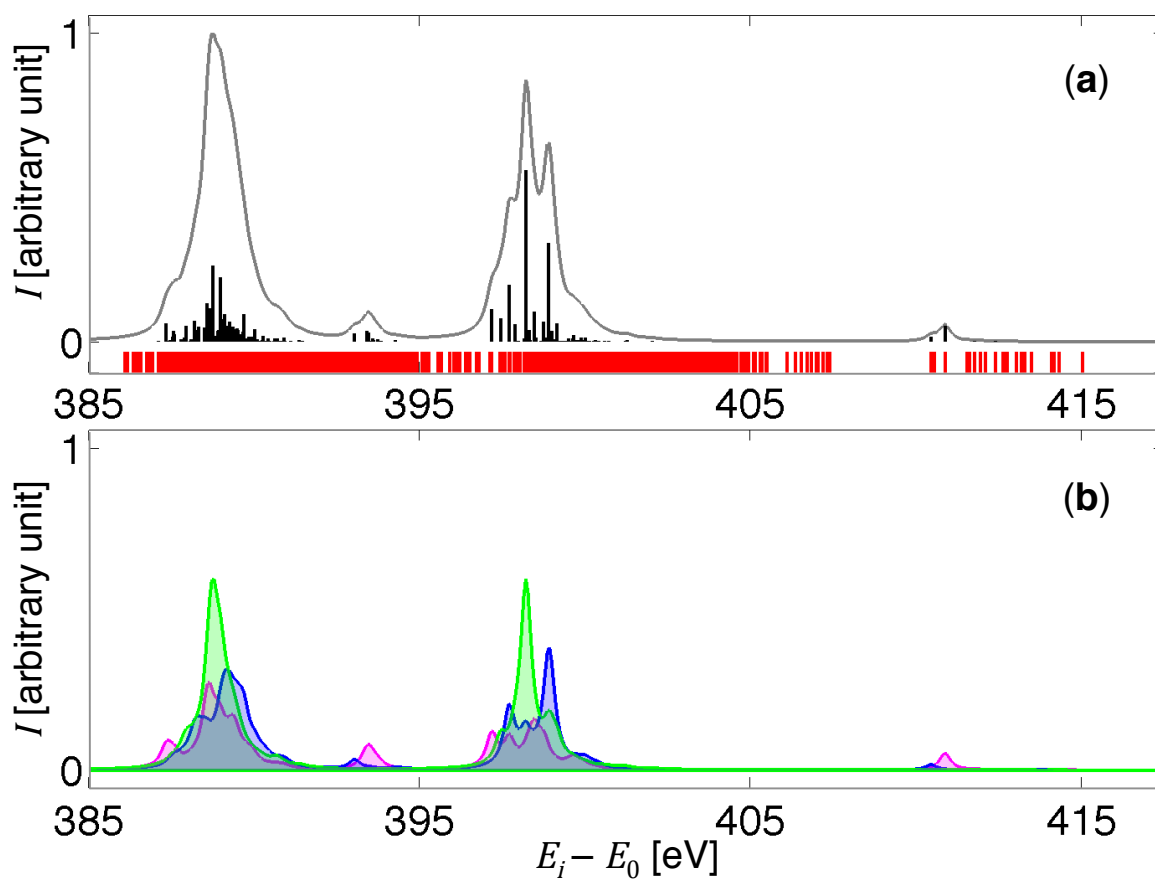

**Fig. S1** LFDFT results of free  $U^{4+}$  ion obtained from DFT calculation using the LDA SVWN functional, showing the multiplet energies of the configuration  $4f^{13}5f^26d^1$  (in red) and intensity of the  $5f^2 \rightarrow 4f^{13}5f^26d^1$  transitions, *i.e.* oscillator strengths (in black) and Lorentzian broadening (in grey) (a) and the deconvolution of the intensity as function of final electronic states with  $J = 3$  (in magenta),  $J = 4$  (in blue) and  $J = 5$  (in green) values (b). In the ordinates, the intensity plots are given in arbitrary unit.

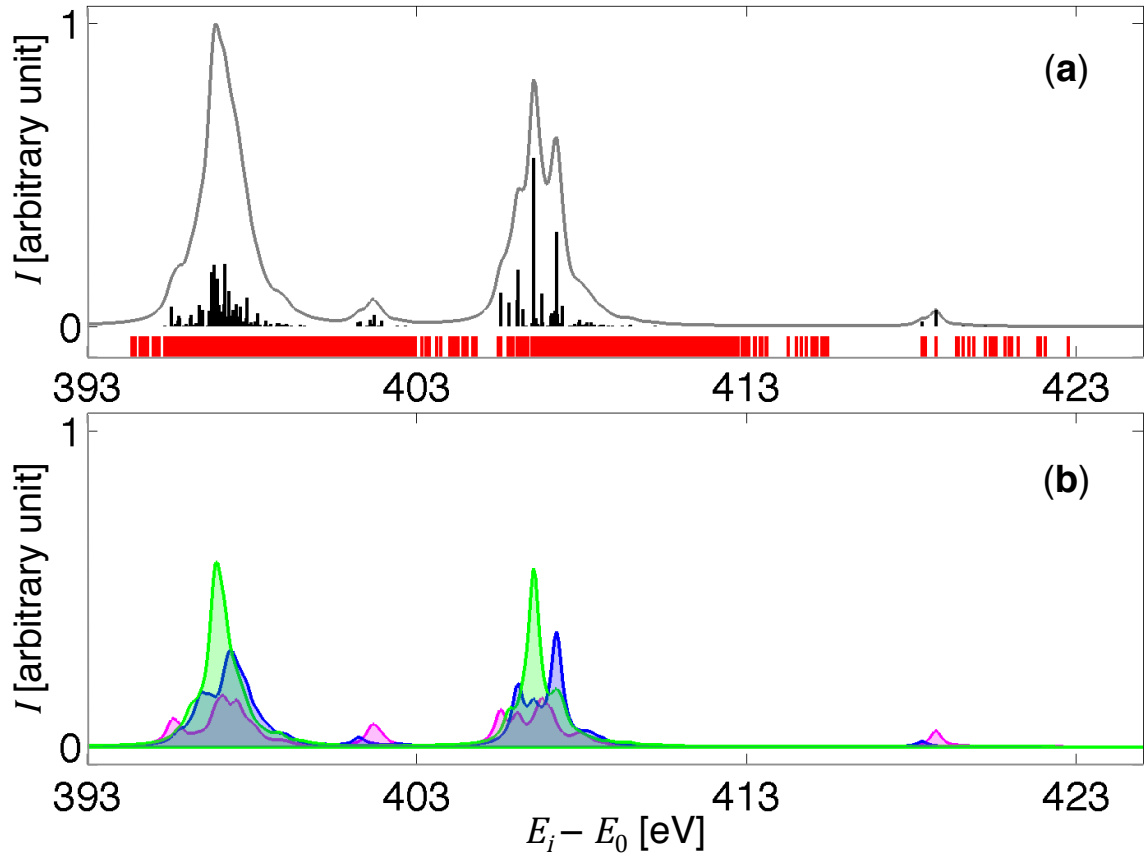

**Fig. S2** LFDFT results of free  $U^{4+}$  ion obtained from DFT calculation using the hybrid B3LYP functional, showing the multiplet energies of the configuration  $4f^{13}5f^2 6d^1$  (in red) and intensity of the  $5f^2 \rightarrow 4f^{13}5f^2 6d^1$  transitions, *i.e.* oscillator strengths (in black) and Lorentzian broadening (in grey) (a) and the deconvolution of the intensity as function of final electronic states with  $J=3$  (in magenta),  $J=4$  (in blue) and  $J=5$  (in green) values (b). In the ordinates, the intensity plots are given in arbitrary unit.

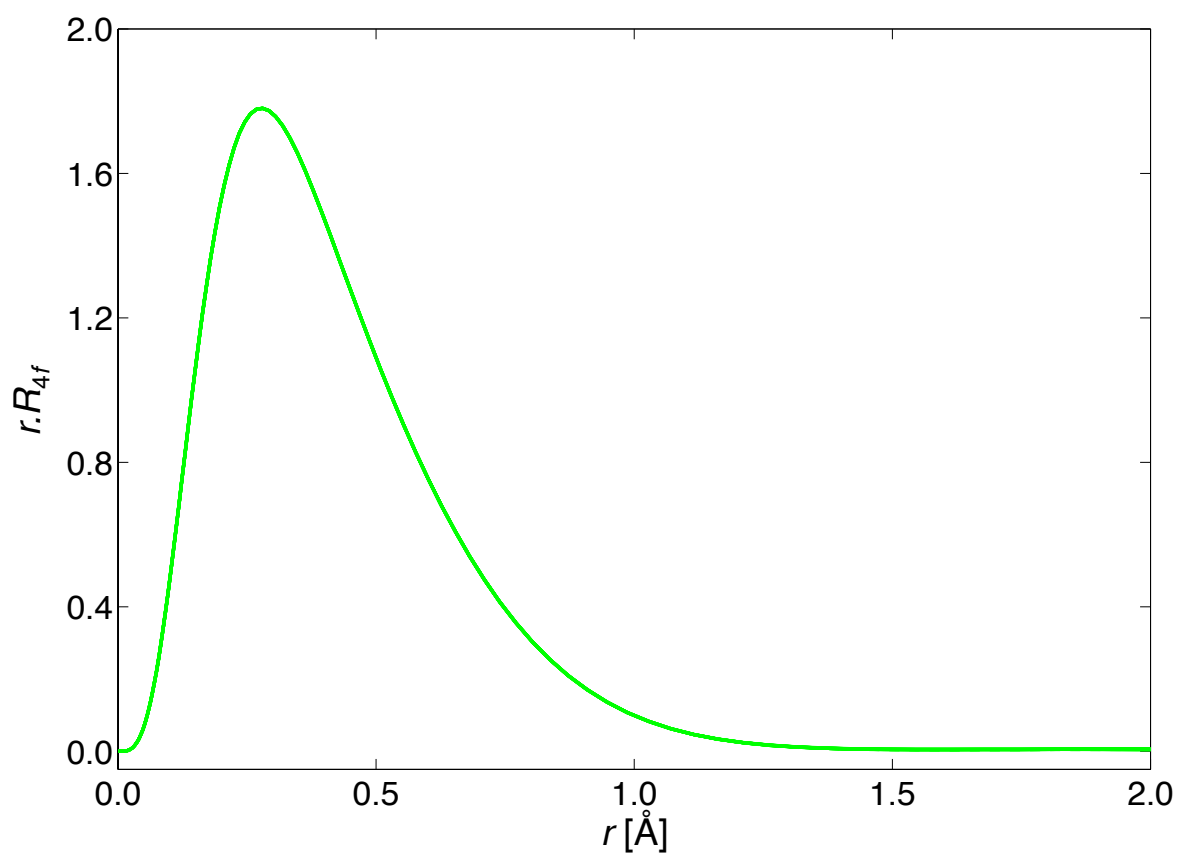

**Fig. S3** Calculated radial functions of the Kohn-Sham orbitals with dominant uranium  $4f$  (a) character obtained for the configuration  $4f^3 5f^2 6d^1$  in the free ion (dashed curve) and in  $(\text{UO}_8)^{12-}$  (solid curve). They are needed for the evaluation of the Slater-Condon integrals (see the text for details). The changes of the radial functions from free ion to molecular cluster are highlighted.

**Table S1.** Calculated excitation energies ( $E_i - E_0$ ), oscillator strengths ( $I$ ) and assignment of the multiplet terms with non-zero transition probabilities obtained in the intra-atomic  $5f^2 \rightarrow 4f^{13}5f^26d^1$  electron transitions in  $U^{4+}$ .

| $E_i - E_0$                      | $I$    | Assignment                                                          |
|----------------------------------|--------|---------------------------------------------------------------------|
| $ 4f^{13}5f^26d^1, J = 5\rangle$ |        |                                                                     |
| 387.526                          | 0.0032 | 15.79 % $^5H$ + 16.76 % $^3I$ + ...                                 |
| 387.785                          | 0.0014 | 11.77 % $^5G$ + 12.90 % $^5H$ + ...                                 |
| 387.908                          | 0.0014 |                                                                     |
| 387.935                          | 0.0102 | 10.84 % $^1H$ + ...                                                 |
| 388.075                          | 0.0014 | 17.68 % $^5G$ + 10.19 % $^5H$ + ...                                 |
| 388.237                          | 0.0071 | 17.00 % $^5F$ + 12.44 % $^3G$ + ...                                 |
| 388.538                          | 0.0018 | 15.39 % $^5F$ + 12.49 % $^3G$ + ...                                 |
| 388.614                          | 0.0135 |                                                                     |
| 388.657                          | 0.0210 | 13.48 % $^5F$ + 13.05 % $^5G$ + ...                                 |
| 388.730                          | 0.0117 |                                                                     |
| 388.750                          | 0.0476 |                                                                     |
| 388.787                          | 0.0038 |                                                                     |
| 388.931                          | 0.0025 |                                                                     |
| 388.976                          | 0.0404 | 18.12 % $^3I$ + ...                                                 |
| 389.079                          | 0.0012 | 15.40 % $^5G$ + ...                                                 |
| 389.180                          | 0.0100 | 12.15 % $^5F$ + 11.05 % $^3I$ + ...                                 |
| 389.294                          | 0.0069 | 12.49 % $^5H$ + ...                                                 |
| 389.358                          | 0.0094 |                                                                     |
| 389.494                          | 0.0074 | 11.73 % $^3H$ + ...                                                 |
| 389.549                          | 0.0030 | 12.49 % $^5G$ + ...                                                 |
| 389.817                          | 0.0030 | 10.36 % $^3G$ + ...                                                 |
| 390.015                          | 0.0010 |                                                                     |
| 390.087                          | 0.0015 |                                                                     |
| 390.238                          | 0.0013 |                                                                     |
| 390.619                          | 0.0020 |                                                                     |
| 390.687                          | 0.0023 |                                                                     |
| 397.424                          | 0.0145 | 18.69 % $^5K$ + 28.54 % $^5I$ + ...                                 |
| 397.868                          | 0.0111 | 22.23 % $^5K$ + 16.13 % $^5K$ + 16.53 % $^3I$ + 16.32 % $^3I$ + ... |
| 398.196                          | 0.1073 | 11.29 % $^3I$ + 27.78 % $^5K$ + 21.47 % $^3I$ + ...                 |
| 398.324                          | 0.0012 | 10.13 % $^3G$ + 13.87 % $^5K$ + 10.46 % $^1H$ + 13.72 % $^5K$ + ... |
| 398.472                          | 0.0026 | 10.31 % $^5I$ + 12.48 % $^3I$ + ...                                 |
| 398.880                          | 0.0156 | 16.19 % $^5I$ + ...                                                 |
| 398.893                          | 0.0035 | 25.72 % $^5K$ + 11.49 % $^3I$ + ...                                 |
| 398.953                          | 0.0023 | 18.70 % $^5K$ + ...                                                 |
| 399.123                          | 0.0115 | 14.81 % $^5I$ + 13.26 % $^5K$ + ...                                 |
| 399.599                          | 0.0023 | 13.69 % $^5I$ + ...                                                 |
| 401.242                          | 0.0011 | 11.91 % $^1H$ + ...                                                 |
| $ 4f^{13}5f^26d^1, J = 4\rangle$ |        |                                                                     |
| 387.585                          | 0.0049 | 13.92 % $^3G$ + 19.49 % $^5G$ + 12.87 % $^3H$ + ...                 |
| 387.881                          | 0.0026 | 12.45 % $^3H$ + ...                                                 |
| 388.096                          | 0.0017 | 13.64 % $^3H$ + ...                                                 |
| 388.186                          | 0.0129 | 17.54 % $^3H$ + ...                                                 |
| 388.308                          | 0.0097 | 11.27 % $^5D$ + ...                                                 |
| 388.498                          | 0.0089 | 15.67 % $^3H$ + ...                                                 |
| 388.555                          | 0.0030 |                                                                     |
| 388.632                          | 0.0021 | 22.36 % $^3G$ + ...                                                 |
| 388.922                          | 0.0023 |                                                                     |
| 388.981                          | 0.0144 | 14.49 % $^3F$ + ...                                                 |
| 389.104                          | 0.0172 |                                                                     |
| 389.157                          | 0.0087 |                                                                     |
| 389.257                          | 0.0128 |                                                                     |
| 389.288                          | 0.0052 |                                                                     |
| 389.402                          | 0.0011 |                                                                     |
| 389.429                          | 0.0076 |                                                                     |
| 389.469                          | 0.0083 | 14.44 % $^3H$ + ...                                                 |
| 389.558                          | 0.0048 | 11.71 % $^3F$ + ...                                                 |
| 389.658                          | 0.0062 |                                                                     |

|         |        |                                                                                                                                  |
|---------|--------|----------------------------------------------------------------------------------------------------------------------------------|
| 389.678 | 0.0172 | 12.00 % <sup>5</sup> D + ...                                                                                                     |
| 390.007 | 0.0080 |                                                                                                                                  |
| 390.256 | 0.0035 |                                                                                                                                  |
| 390.415 | 0.0021 | 12.23 % <sup>3</sup> H + ...                                                                                                     |
| 390.893 | 0.0025 | 21.18 % <sup>3</sup> H + ...                                                                                                     |
| 393.016 | 0.0054 | 11.82 % <sup>5</sup> I + ...                                                                                                     |
| 397.691 | 0.0355 | 18.88 % <sup>5</sup> I + 20.58 % <sup>3</sup> H + 15.24 % <sup>5</sup> H + ...                                                   |
| 398.184 | 0.0182 | 12.15 % <sup>5</sup> I + 12.27 % <sup>3</sup> H + ...                                                                            |
| 398.502 | 0.0029 | 10.26 % <sup>5</sup> F + 15.84 % <sup>5</sup> H + 13.39 % <sup>3</sup> G + ...                                                   |
| 398.780 | 0.0029 |                                                                                                                                  |
| 398.886 | 0.0616 | 19.51 % <sup>5</sup> I + 11.49 % <sup>5</sup> I + 11.71 % <sup>3</sup> H + ...                                                   |
| 398.963 | 0.0068 | 18.92 % <sup>5</sup> I + ...                                                                                                     |
| 399.003 | 0.0013 |                                                                                                                                  |
| 399.742 | 0.0011 | 10.52 % <sup>5</sup> H + ...                                                                                                     |
| 399.999 | 0.0027 | 11.67 % <sup>5</sup> I + ...                                                                                                     |
| 410.425 | 0.0033 | 19.95 % <sup>1</sup> G + 69.66 % <sup>3</sup> H + ...                                                                            |
| <hr/>   |        |                                                                                                                                  |
|         |        | $ 4f^3 5f^2 6d^1, J=3\rangle$                                                                                                    |
| 387.330 | 0.0114 | 12.65 % <sup>5</sup> H + 22.26 % <sup>5</sup> G + 22.56 % <sup>5</sup> G + 11.02 % <sup>3</sup> G + 15.69 % <sup>3</sup> G + ... |
| 387.445 | 0.0012 | 14.83 % <sup>3</sup> F + ...                                                                                                     |
| 387.565 | 0.0069 | 17.29 % <sup>5</sup> F + 10.41 % <sup>3</sup> G + 12.53 % <sup>3</sup> F + ...                                                   |
| 387.928 | 0.0010 |                                                                                                                                  |
| 388.190 | 0.0015 | 11.75 % <sup>5</sup> D + ...                                                                                                     |
| 388.568 | 0.0242 | 17.60 % <sup>3</sup> G + ...                                                                                                     |
| 388.613 | 0.0137 | 10.43 % <sup>3</sup> G + ...                                                                                                     |
| 388.702 | 0.0073 |                                                                                                                                  |
| 388.789 | 0.0015 | 18.84 % <sup>3</sup> F + ...                                                                                                     |
| 388.884 | 0.0067 | 13.40 % <sup>5</sup> D + ...                                                                                                     |
| 388.923 | 0.0073 |                                                                                                                                  |
| 389.003 | 0.0079 | 10.77 % <sup>3</sup> G + ...                                                                                                     |
| 389.075 | 0.0011 |                                                                                                                                  |
| 389.153 | 0.0014 | 13.27 % <sup>1</sup> F + ...                                                                                                     |
| 389.322 | 0.0065 |                                                                                                                                  |
| 389.329 | 0.0074 |                                                                                                                                  |
| 389.371 | 0.0035 |                                                                                                                                  |
| 389.443 | 0.0055 |                                                                                                                                  |
| 389.511 | 0.0012 | 11.86 % <sup>3</sup> D + ...                                                                                                     |
| 389.639 | 0.0011 |                                                                                                                                  |
| 389.724 | 0.0019 |                                                                                                                                  |
| 389.777 | 0.0013 |                                                                                                                                  |
| 389.907 | 0.0014 |                                                                                                                                  |
| 389.924 | 0.0029 |                                                                                                                                  |
| 390.014 | 0.0012 |                                                                                                                                  |
| 390.881 | 0.0010 |                                                                                                                                  |
| 393.381 | 0.0067 |                                                                                                                                  |
| 393.451 | 0.0060 | 17.34 % <sup>3</sup> D + ...                                                                                                     |
| 393.559 | 0.0020 | 18.36 % <sup>3</sup> F + 10.36 % <sup>3</sup> F + 11.90 % <sup>1</sup> F + ...                                                   |
| 393.605 | 0.0012 | 11.68 % <sup>3</sup> D + ...                                                                                                     |
| 393.727 | 0.0018 |                                                                                                                                  |
| 397.167 | 0.0205 | 19.92 % <sup>5</sup> H + 36.06 % <sup>3</sup> G + ...                                                                            |
| 397.689 | 0.0166 | 14.57 % <sup>5</sup> H + 10.31 % <sup>3</sup> G + 11.39 % <sup>3</sup> G + ...                                                   |
| 398.150 | 0.0023 | 12.83 % <sup>5</sup> G + 12.04 % <sup>3</sup> F + ...                                                                            |
| 398.305 | 0.0072 | 16.00 % <sup>3</sup> G + 10.84 % <sup>1</sup> F + 10.08 % <sup>1</sup> F + ...                                                   |
| 398.454 | 0.0191 | 10.42 % <sup>3</sup> F + 15.57 % <sup>3</sup> G + ...                                                                            |
| 398.730 | 0.0126 |                                                                                                                                  |
| 398.756 | 0.0015 |                                                                                                                                  |
| 399.065 | 0.0014 |                                                                                                                                  |
| 399.476 | 0.0019 | 10.70 % <sup>5</sup> H + ...                                                                                                     |
| 399.640 | 0.0044 | 10.79 % <sup>5</sup> H + 13.74 % <sup>5</sup> G + ...                                                                            |
| 399.871 | 0.0026 | 17.58 % <sup>5</sup> H + ...                                                                                                     |
| 410.847 | 0.0102 | 69.75 % <sup>3</sup> G + 17.34 % <sup>1</sup> F + ...                                                                            |
